# Supplementary material for: Consequences of Landscape Fragmentation on Lyme Disease Risk: A Cellular Automata Approach
Source: PLoS One. 2012 Jun 25;7(6):e39612. doi: 10.1371/journal.pone.0039612 (PMC3382467; doi:10.1371/journal.pone.0039612)
Supplement: Appendix S1 — Formulae for tick life cycle and disease transmission. (DOC) [file pone.0039612.s001.doc]

**Appendix S1 Formulae for tick life cycle and disease transmission**

For each cell at time step *t*, we modelled:

1. Development of tick populations:

(1)

(2)

(3)

where *qL*, *qN* and *qA* indicate the questing populations of larvae, nymphs and adults. Superscripts *H* and *R* for nymphs (*N*) indicate the population is feeding on reproduction hosts and reservoir hosts respectively. *dAL, dLN* and *dNA* are development periods between feeding and moulting into the next life stages and *sAL, sLN* and *sNA* are tick survival rates in those periods. *sqL, sqN* and *sqA* are tick survival rates in feeding phases. All survival rates are 0.94 times lower in grassland than in woodland. *β* refers to the number of eggs per adult.

2. Disease transmission

a. Systemic transmission:

(4)

(5)

(6)

b. Trans-ovarial transmission:

(7)

where Δ*fIL*, Δ*fIN*, andΔ*IH* are the increased infectious populations of feeding larvae, feeding nymphs and reservoir hosts by systemic disease transmission. Δ*qIL* is the increased infectious population of questing larvae by trans-ovarial transmission. *θHT* and *θTH* indicate the efficiency of pathogen transmitting from reservoir hosts to ticks and from ticks to reservoir hosts. *θTE* indicates the transmission efficiency from adults to their eggs.

c. Infectious populations of questing tick and reservoir host:

(8)

(9)

(10)

(11)

where *qIL*, *qIN*, *qIA* and *IH* indicate infectious questing larvae, nymphs, adults and infectious reservoir hosts. *rH* is the removal rate of reservoir infections.
